# Supplementary material for: Identification of Cryptic Anopheles Mosquito Species by Molecular Protein Profiling
Source: PLoS One. 2013 Feb 28;8(2):e57486. doi: 10.1371/journal.pone.0057486 (PMC3585343; doi:10.1371/journal.pone.0057486)
Supplement: Table S4 — CAT scores for the SDA model discriminating the Anopheles arabiensis colonies (Model 3). The table lists the computed correlation-adjusted t-scores (CAT scores) of the mean versus the pooled mean for each predictor variable (i.e. peak) and centroid. Score: The sum of the squared CAT scores across groups which determines the overall ranking of the peaks. CAT.BOBO, CAT.DONGOLA, CAT.HARARE, CAT.KGB and CAT.SENN are the CAT scores of the centroid versus the pooled mean for each group and peak. LFDR: The local false discovery rate computed for each peak. HC: The higher criticism score computed for each peak. (XLS) [file pone.0057486.s004.xls]

## Sheet: ranking.strains.ar
Rank	Peak	Score	cat.BOBO	cat.DONGOLA	cat.HARARE	cat.KGB	cat.SENN	lfdr	HC
1	M5507.93	209.961	9.37508	-4.65578	6.28506	-5.08822	-5.91613	0.0121631	0.975355
2	M8879.82	209.309	8.28067	-6.73915	7.20204	-5.9888	-2.75476	0.0289119	1.40314
3	M9272.36	193.271	8.273	-5.81436	6.88293	-4.58589	-4.75567	0.2075	1.7127
4	M8106.25	145.435	-5.51792	-2.71723	10.271	-1.15725	-0.878577	0.2075	1.69267
5	M7939.84	141.961	5.27776	-3.98928	7.63491	-4.25371	-4.66968	0.2075	1.91794
6	M5328.44	136.098	-5.83886	6.22545	-6.09425	5.06977	0.637883	0.376817	2.30481
7	M8654.03	126.431	-4.18515	-3.30497	-3.93929	2.78566	8.64375	0.376817	2.29592
8	M4634.76	120.418	7.43392	-2.08879	3.98169	-3.81402	-5.5128	0.376817	2.31771
9	M7762.5	115.821	-2.82031	9.25338	-3.06778	0.210472	-3.57576	0.447496	2.5589
10	M5371.93	98.3801	4.23574	-0.906014	5.97494	-5.21335	-4.09132	0.447496	2.28037
11	M5607.91	96.5228	-3.14351	-4.44367	-3.07909	5.84768	4.81859	0.447496	2.31564
12	M7844.17	95.4218	4.11935	6.00349	-1.03235	-4.66042	-4.43007	0.447496	2.60202
13	M5093.69	95.3096	2.25022	3.06539	0.0138113	3.10798	-8.4374	0.447496	2.77717
14	M6768.52	91.7981	4.55184	-3.10632	4.65909	0.194956	-6.29957	0.447496	2.7982
15	M12685.6	90.7893	2.08024	-1.73647	-5.24969	-2.22962	7.13555	0.447496	2.87039
16	M6851.85	89.3752	5.04364	5.06198	-1.75906	-4.61284	-3.73372	0.447496	3.06478
17	M10074	84.8538	3.18924	-3.22837	-2.16531	-4.24296	6.4474	0.447496	3.20142
18	M29776.9	84.1845	3.80094	-2.72769	5.25236	-5.87418	-0.451426	0.447496	3.27961
19	M12354.7	83.2838	5.54478	2.24983	-6.60667	0.65577	-1.84371	0.447496	3.3239
20	M10718.5	81.5258	7.47628	-1.20617	-4.72608	-1.34134	-0.202685	0.447496	3.24351
21	M9156.32	81.1335	-4.97898	5.31324	-4.09617	3.3401	0.421811	0.447496	3.34877
22	M9435.38	81.1247	0.655079	-2.42314	7.59394	-2.60824	-3.21763	0.447496	3.50697
23	M6721.87	81.0364	4.42596	-2.45805	5.34938	-3.75368	-3.56361	0.447496	3.6518
24	M8462.24	78.8011	-1.21943	7.3862	-4.36405	0.120456	-1.92318	0.447496	3.63494
25	M5280.21	78.7268	4.87822	-1.92925	4.41453	-5.19983	-2.16367	1	3.93232
26	M5619.94	77.9642	-2.77657	5.83738	-4.33952	3.51432	-2.23562	1	3.96807
27	M9478.65	76.6215	7.33866	-4.03659	0.169159	-2.19294	-1.27828	1	4.05877
28	M6942.9	73.914	-3.44858	5.091	-3.66822	4.22189	-2.1961	1	4.20161
29	M13188.2	71.2867	-2.2415	-3.16409	-3.75236	4.92297	4.23498	1	4.00917
30	M8688.4	69.9071	6.90979	-4.01514	0.419753	-2.08833	-1.22607	1	3.87978
31	M10248.8	68.5367	5.49205	1.22872	0.46677	-5.9193	-1.26824	1	3.73705
32	M7902.4	65.8085	6.21875	0.401881	0.626652	-3.22374	-4.02354	1	3.40581
33	M6378.62	65.749	3.88036	-1.99282	-4.86908	-1.55618	4.53772	1	3.54601
34	M8559.42	63.2903	-4.24572	4.02972	-4.01436	3.52274	0.707628	1	3.8384
35	M11941.4	60.1973	-3.46019	0.0878966	-4.01745	2.15013	5.23962	1	3.41974
36	M6784.62	60.0046	-6.31745	3.38979	1.04394	2.63593	-0.752218	1	3.51723
37	M3808.4	56.3678	-3.4448	1.81274	-4.62615	2.78905	3.46916	1	2.63396
38	M5266.39	56.105	3.36283	-2.6289	4.76654	-2.88754	-2.61293	1	2.69911
39	M5216.1	51.86	-6.09103	2.62199	1.41098	2.40305	-0.344991	1	1.84827
40	M9333.14	49.8641	-3.65581	5.38555	-0.293039	1.06731	-2.50401	1	1.78115
41	M13942.2	49.7558	-2.9781	-0.814032	-3.53858	3.02007	4.31065	1	1.89387
42	M5589.3	49.2971	3.73713	0.959989	-5.79365	0.895967	0.200561	1	1.84497
43	M5416.07	49.2717	-4.20388	-3.24932	1.6966	3.77087	1.98573	1	1.99592
44	M6177.78	48.4017	2.87223	1.02153	2.64065	-0.944894	-5.58951	1	1.91072
45	M9351.42	47.9872	5.12229	-3.65383	1.6566	-2.18363	-0.941432	1	1.87334
46	M10885.3	46.7083	2.48069	2.27914	1.72464	-0.858809	-5.62566	1	1.72494
47	M9731.78	44.1405	-2.25305	5.14516	-1.51218	1.47254	-2.85247	1	0.994072
48	M6931.64	42.3691	1.08454	-1.61896	5.23515	-2.10896	-2.59177	1	0.780281
49	M9718.24	42.1937	-4.89822	2.1092	-0.459155	3.6571	-0.408934	1	0.840851
50	M4615.98	42.191	2.54986	1.33364	2.21229	-0.763496	-5.3323	1	1.00957
51	M7094.17	42.0574	-0.677041	-0.973584	5.68239	-1.67385	-2.35792	1	1.09736
52	M6219.09	42.0433	-3.39893	4.53229	2.14129	-1.66953	-1.60512	1	1.26143
53	M19435.1	38.4868	-4.13945	-1.18088	-0.105224	4.32955	1.09601	1	0.225734
54	M6963.86	38.4821	-2.50881	1.47714	-3.04788	4.52926	-0.449712	1	0.400128
55	M6590.07	38.195	-2.46004	0.658696	5.08447	-2.12529	-1.15784	1	0.363351
56	M8237.25	38.1197	1.05674	-3.04127	-3.41777	3.56143	1.84087	1	0.487034
57	M6493.01	37.5285	-4.20757	1.59991	-2.29286	2.46464	2.43587	1	0.578638
58	M14991.8	37.4333	3.19871	-0.341649	3.0392	-3.43039	-2.46587	1	0.690679
59	M4794.83	36.3146	-4.46808	3.31608	-0.847677	-0.14834	2.14801	1	0.14271
60	M9396.92	36.0824	1.58473	-1.65976	4.55184	-2.04346	-2.43336	1	0.133137
61	M6813.72	35.6542	-2.56142	3.87829	-0.762711	2.30332	-2.85748	1	0.0507296
62	M9125.3	34.8452	-3.47006	-1.74185	2.20854	3.78006	-0.776692	1	0.189427
63	M12985.2	34.6468	-3.16078	1.27895	-3.16743	2.87138	2.17787	1	0.412166
64	M10534.7	34.2684	1.25647	-0.486356	0.82884	3.10487	-4.70382	1	0.462634
65	M8082.69	34.0812	-2.39017	0.591514	-3.40783	3.79725	1.40924	1	0.489744
66	M5442.32	33.0441	-4.00096	3.2523	2.2353	-0.320646	-1.16599	1	0.18632
67	M6974.55	32.4947	-4.10081	2.63832	-1.08835	-0.187346	2.73819	1	0.59002
68	M4022.75	32.1514	-2.84502	3.26101	-3.10736	1.07587	1.61549	1	0.774277
69	M6194.35	32.0878	-3.02001	2.29522	3.61147	-1.9384	-0.948276	1	0.63108
70	M12387.8	32.0064	-3.55051	3.2787	0.496958	1.93415	-2.15929	1	0.504669
71	M12660.8	31.7863	0.176311	4.27353	0.301538	-1.34771	-3.40367	1	0.0617044
72	M11323.4	31.2749	-2.30398	1.31505	-1.97233	-1.34449	4.30575	1	0.246463
73	M4533.2	31.129	-2.16607	-1.03292	-2.28529	4.34042	1.14386	1	0.188909
74	M8716.96	30.9623	-0.0550842	2.35753	-0.320713	2.42489	-4.40663	1	0.160617
75	M12268.8	30.679	3.39555	1.37281	0.949655	-2.94551	-2.77251	1	0.0184327
76	M8015.67	30.6204	-0.78703	1.28226	-4.35473	0.943527	2.91597	1	0.205542
77	M5286.27	30.6023	-2.77417	1.39206	-2.53077	3.81498	0.097904	1	0.526442
78	M12517.4	30.3721	0.195556	-4.69942	0.645509	2.37026	1.4881	1	0.471553
79	M7523.54	30.3269	-4.68383	2.27296	-0.0781951	1.00122	1.48785	1	0.795356
80	M2793.38	29.6015	-1.47427	1.95974	-1.4975	3.73347	-2.72143	1	0.56612
81	M9591.84	28.7246	-2.65568	0.964076	-3.04367	2.73307	2.00221	1	0.73972
82	M5552.07	28.6575	4.59611	-0.257788	-1.46716	-0.663404	-2.20776	1	0.112909
83	M16729	28.5122	-3.4975	0.593805	-1.69721	3.41006	1.19085	1	0.763177
84	M2556.3	28.4238	-3.79802	0.26535	0.00923527	-0.203109	3.72654	1	0.918049
85	M6362	27.2955	2.2374	2.32843	-3.87055	-1.25458	0.559309	1	1.3014
86	M9612.97	27.18	3.06837	-3.28726	2.09158	-1.58084	-0.291853	1	1.0538
87	M7587.91	26.5403	-2.92681	2.67459	-2.53618	1.89465	0.893741	1	0.0774713
88	M6260.7	26.0554	1.85034	-4.28446	1.0865	-0.371776	1.71941	1	0.23368
89	M6343.12	25.755	-3.01258	3.86081	-0.923402	0.715069	-0.639896	1	0.275998
90	M3839.3	25.6065	-0.102143	-1.50638	4.29975	-2.12589	-0.565338	1	0.29763
91	M3887.12	23.8829	-1.04085	4.04789	-0.139498	-0.365299	-2.50225	1	0.709219
92	M4725.67	23.5223	3.88368	0.0777289	0.133353	-1.92095	-2.17381	1	0.516091
93	M11466	23.3212	2.86275	0.748397	1.40177	-2.37213	-2.64079	1	0.349111
94	M6575.07	23.189	-2.08946	-0.908753	3.53436	-1.90542	1.36928	1	0.106353
95	M7804.92	23.1133	-1.96801	-0.334302	4.1522	-1.22215	-0.62774	1	0.00103556
96	M9495.53	22.8903	3.00531	-3.06727	1.74112	-0.906517	-0.772634	1	0.0770372
97	M6134.23	22.7161	2.26254	1.05659	1.81577	-2.56572	-2.56919	1	0.0933263
98	M10222.6	22.1255	-2.4037	0.54929	0.949704	-2.26194	3.16665	1	0.0363137
99	M9315.51	21.2668	-2.44038	2.56175	0.929002	1.38977	-2.44015	1	0.47827
100	M5386.3	21.1117	1.4027	-1.42649	-2.02963	3.35926	-1.30584	1	0.472773
101	M5188.09	20.6417	1.29059	-2.96785	-0.925295	-0.419933	3.02249	1	0.10962
102	M13305.6	20.5732	-1.5876	-0.580173	-1.46155	3.93528	-0.305956	1	0.0116318
103	M8279.06	19.7652	3.69092	0.314542	-0.859229	-1.99487	-1.15136	1	0.735574
104	M2004.42	19.4493	0.778168	1.86874	-3.20591	-1.28853	1.84753	1	0.910303
105	M3005.27	18.8207	0.329773	0.614156	3.11516	-2.47254	-1.58655	1	1.43002
106	M7343.36	18.6185	-0.776105	-1.33632	-1.10523	3.82605	-0.608395	1	1.47643
107	M7011.56	18.5005	3.49558	-2.42416	-0.346414	-0.467399	-0.257607	1	1.43031
108	M3301.75	18.275	1.64555	1.28679	-3.13614	1.52584	-1.32204	1	0.647384
109	M3277.2	17.9203	-2.84875	0.579574	-1.39897	1.20784	2.4603	1	0.860878
110	M8219.6	17.6876	-2.12054	1.01133	-2.40923	2.05424	1.4642	1	0.942841
111	M10559.2	17.4226	1.93979	-1.24899	1.41791	-3.03754	0.928831	1	1.05907
112	M7979.56	17.0912	-1.10886	1.73667	-2.22226	2.61877	-1.02432	1	1.0792
113	M8490.56	16.6807	-1.51689	3.52167	-0.527754	-0.187024	-1.29001	1	1.34899
114	M7709.32	16.0387	-2.92891	-0.548373	0.134088	2.55279	0.790403	1	1.86202
115	M15662.5	15.4201	1.33284	-0.472507	-2.55558	-0.803496	2.49875	1	2.18051
116	M2010.06	15.4125	-0.158981	0.854444	2.81433	-2.29219	-1.2176	1	2.02326
117	M5117.24	14.8917	-1.65261	-0.20649	-2.07853	1.81857	2.11906	1	2.07377
118	M7574.36	14.4248	-0.825312	-2.23438	-0.91562	1.91246	2.06285	1	1.74478
119	M9452.92	14.4095	1.7302	-3.15718	1.12439	-0.111544	0.414137	1	1.59897
120	M12134.7	14.3657	-1.98674	-0.995817	0.649936	2.93887	-0.606248	1	1.48275
121	M5146	14.2809	-0.37404	1.70456	0.743332	-3.10241	1.02856	1	1.40894
122	M11959.4	13.6096	2.09064	-1.9148	-1.83879	0.195667	1.46728	1	1.7769
123	M6253.96	13.4307	-2.47162	1.7849	-1.30376	1.47228	0.518196	1	1.79913
124	M8189.42	12.8273	0.75859	0.547884	-3.16616	0.615325	1.24436	1	2.25223
125	M6242.53	12.6362	-0.826174	2.96756	-1.7526	-0.191201	-0.197592	1	2.28542
126	M12430.2	11.3068	2.31145	-1.93408	0.820148	-1.24438	0.0468665	1	3.13114
127	M4553.85	10.5613	1.2711	0.965307	-0.265314	0.746628	-2.71772	1	3.38358
128	M14021.8	9.78896	-2.63694	0.718931	-0.213821	1.08334	1.04849	1	3.95997
129	M6015.38	9.65597	2.01371	0.126514	0.821354	-0.968533	-1.99305	1	3.77566
130	M9757.36	9.61238	2.10168	0.299896	-1.38368	-1.66496	0.647063	1	3.66199
131	M5250.33	9.42847	-0.745556	1.64414	-2.11682	1.29702	-0.078783	1	3.67912
132	M7289.82	9.428	0.550143	1.7885	-1.87409	-1.30617	0.841621	1	3.52499
133	M8366.27	9.30144	-0.693155	-0.122549	2.21983	-1.90467	0.500552	1	3.48825
134	M6560.17	8.80412	-0.838911	-0.359698	-1.54169	0.411103	2.3292	1	3.48458
135	M5345.32	7.31198	-0.234041	-0.951272	-1.45297	0.702341	1.93594	1	4.20073
136	M4845.01	6.99159	-0.383497	1.79625	-1.83874	0.483475	-0.0574894	1	4.17159
137	M6606.78	6.95958	-0.315778	-0.399651	-1.35592	-0.129741	2.20109	1	4.04752
138	M12162.8	6.59441	1.86303	0.51275	-0.574769	-1.57447	-0.226535	1	4.20268
139	M8258.86	6.42647	-1.20275	1.0457	-0.843353	-0.656247	1.65665	1	4.03967
140	M7777.7	6.18708	-0.525349	-0.0956124	-1.6123	0.480739	1.75252	0.447496	3.77938
141	M2001.55	5.92137	-0.638868	-0.582146	1.57987	-1.32266	0.963798	0.447496	3.68945
142	M12482.8	5.00686	-1.65447	-0.000137935	1.50263	0.0674627	0.0845168	0.447496	3.15747
143	M2670.28	4.84566	1.21102	0.111734	0.346273	0.128264	-1.79729	0.447496	3.12216
144	M4356.57	4.70262	1.27085	0.877119	-0.440284	-1.43103	-0.276648	0.447496	3.06992
145	M6041.58	4.40591	-0.636089	0.615892	1.55704	-0.677195	-0.859651	0.447496	2.96724
146	M7430.66	3.99183	0.956516	-0.303203	0.44337	-1.59406	0.497374	0.447496	2.76873
147	M9109.95	3.62485	0.409192	-0.77547	-0.0893667	-0.943559	1.3992	0.447496	2.50353
148	M4437.88	3.36561	-0.231159	-1.39714	1.09369	0.37004	0.164571	0.447496	2.11004
149	M10299	2.96908	-0.681157	0.953675	-0.76053	0.914128	-0.426118	0.447496	2.22249
150	M2006.67	2.65583	0.291595	0.801934	-1.36962	0.0551255	0.220961	0.447496	2.25519
151	M9235.15	1.78554	-0.479397	-0.0204876	-0.82	0.582951	0.736933	0.376817	2.4517
152	M7684.42	0.831719	-0.508168	0.269393	-0.225077	-0.182001	0.645854	0.2075	2.12411
